# Supplementary material for: A synergistic combination of atomic scale structural engineering and panoscopic approach in p-type ZrCoSb-based half-Heusler thermoelectric materials for achieving high ZT
Source: Royal Society of Chemistry journal article supplement (doi:10.1039/c6tc01115b), 2016-01-01
Supplement: c6tc01115b1.pdf [file c6tc01115b1.pdf]

**Synergistic Combination of Atomic Scale Structural Engineering and Panoscopic Approach in p-type ZrCoSb-based half-Heusler thermoelectric materials for high ZT”.**

N. S. Chauhan<sup>1,2</sup>, A. Bhardwaj<sup>1,2</sup>, T. D. Senguttuvan<sup>1,2</sup>, R. P. Pant<sup>2,3</sup>, R.C. Mallik<sup>4</sup> and D. K. Misra\*<sup>1,2</sup>

<sup>1</sup>Physics of Energy Harvesting Division, CSIR-National Physical Laboratory, Dr. K.S. Krishnan Marg, New Delhi-110012.

<sup>2</sup>Academy of Scientific & Innovative Research (AcSIR), CSIR-National Physical Laboratory (CSIR-NPL) Campus, New Delhi-110012, India.

<sup>3</sup>EPR Spectroscopy Section, CSIR-National Physical Laboratory, Dr. K.S. Krishnan Marg, New Delhi-110012.

<sup>4</sup>Department of Physics, Indian Institute of Science, Bangalore, 560 012, India.

**SUPPLEMENTARY INFORMATION**

The SEM morphologies and corresponding energy dispersive X-ray analysis (EDAX) spectrum recorded from the each of the composition of  $\text{ZrCo}_{1+x}\text{Sb}_{0.9}\text{Sn}_{0.1}$  ( $x=0.01, 0.03, 0.05$  and  $0.07$ ) are shown in Fig S1 indicating a clear two phase contrast and compositions very close to their respective nominal compositions. Figure S1(a, b, c & d) envisages the increasing FH inclusions within the HH matrix with increasing content of excess Co in compositions  $\text{ZrCo}_{1+x}\text{Sb}_{0.9}\text{Sn}_{0.1}$  ( $x=0.01, 0.03, 0.05$  and  $0.07$ ). Interestingly, one can clearly notice the increasing size of FH inclusions and its multiple length scales (S1c, e & f) with increasing FH fractions. The compositional analysis was performed employing EDAX to verify the homogeneities of the samples. A representative EDS spectrum and quantification of elements of  $\text{ZrCo}_{1+x}\text{Sb}_{0.9}\text{Sn}_{0.1}$  ( $x=0.01, 0.03, 0.05$  and  $0.07$ ) have been displayed in Fig S1 showing all constituent elements and quantification of composition obtained from the average of values taken at 8 positions shown in the Insets reveals compositions close to the corresponding nominal compositions. The compositions of HH and FH in all the compositions  $\text{ZrCo}_{1+x}\text{Sb}_{0.9}\text{Sn}_{0.1}$  have been quantified and averaged from values taken at 8 positions and no obvious impurities phase were observed other than HH and FH in any of the composite samples. A representative EDS spectrum and quantification of elements for the best performing sample  $\text{ZrCo}_{1+x}\text{Sb}_{0.9}\text{Sn}_{0.1}$  have been presented for each composition.

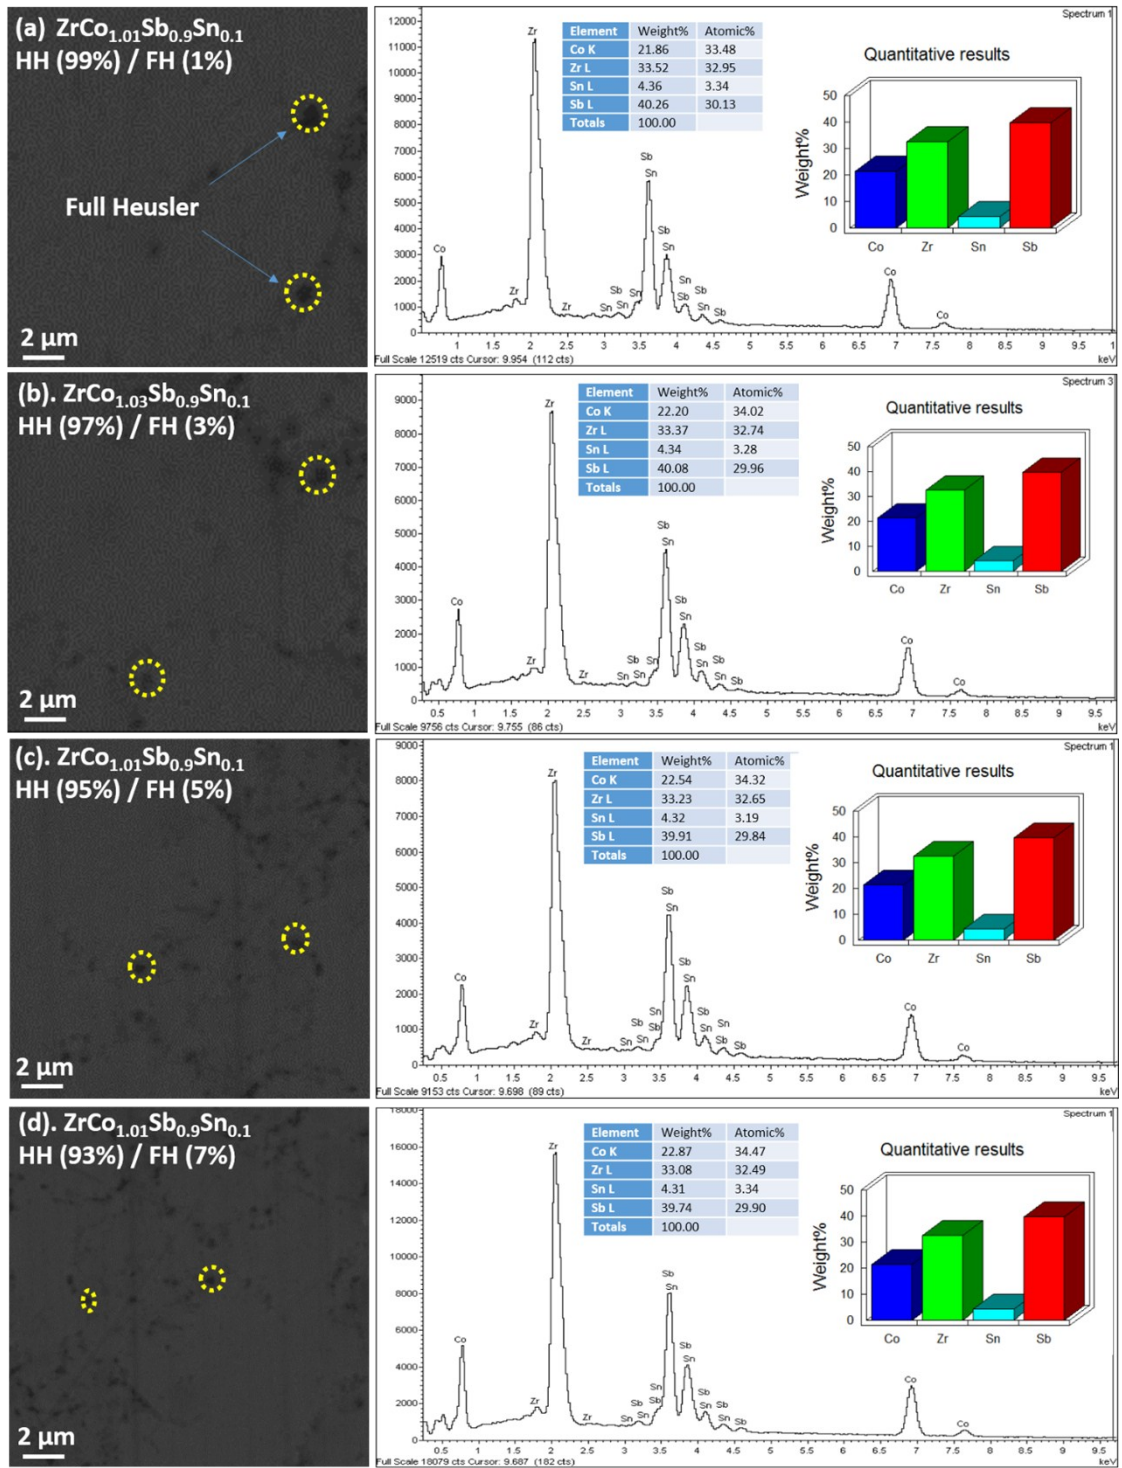

Figure. S1. The back scattered SEM micrograph along with representative EDS spectrum and quantification of elements of HH (1-x)/FH(x),  $ZrCo_{1+x}Sb_{0.9}Sn_{0.1}$  ( $x=0.01, 0.03, 0.05$  and  $0.07$ )
